# Supplementary material for: Research on Overburden Breakage Evolution and Surface Damage Characteristics in High-Intensity Mining of Shallow Coal Seams
Source: Research Square preprint supplement (doi:10.21203/rs.3.rs-5858709/v1), 2025-04-02
Supplement: Supplementary file 1 [file 1ce03130a84f8904f359cdc7.docx]

# Data Availability

The data that support the findings of this study are available from the corresponding author upon reasonable request.
